# Supplementary material for: Dual-Action Compounds for Glycemic Control: N-Benzyl-2,5-Dioxopyrrolidin-3-yl-Methanesulfonamide and 2-Benzylsuccinimide mimic α-Amylase and α-Glucosidase activities to regulate blood glucose levels
Source: Research Square preprint supplement (doi:10.21203/rs.3.rs-7306006/v1), 2025-10-16
Supplement: Supplementary file 1 [file 4e0e35737eec1a43658c1506.docx]

**Supplementary Material**

**S. Figure 1**

**
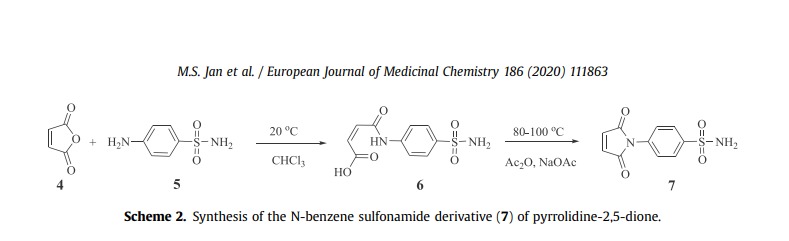
**

**
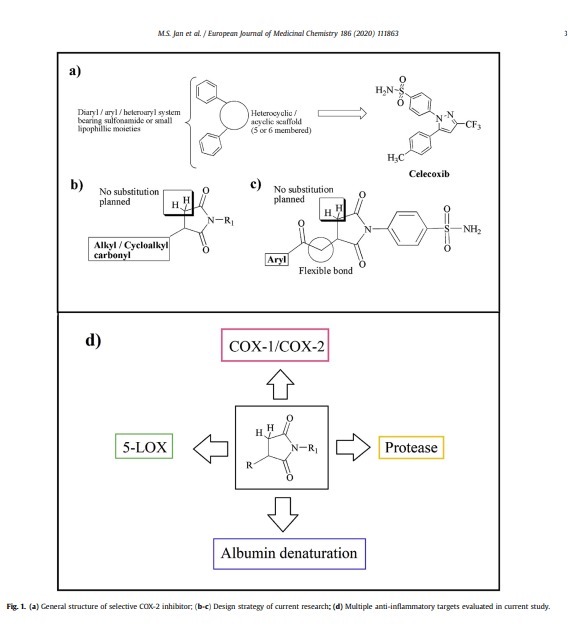
**

**S. Figure 1: Compounds Scheme of synthesis:** Adopted from our previously published article.

**S. Figure 2**

**A**


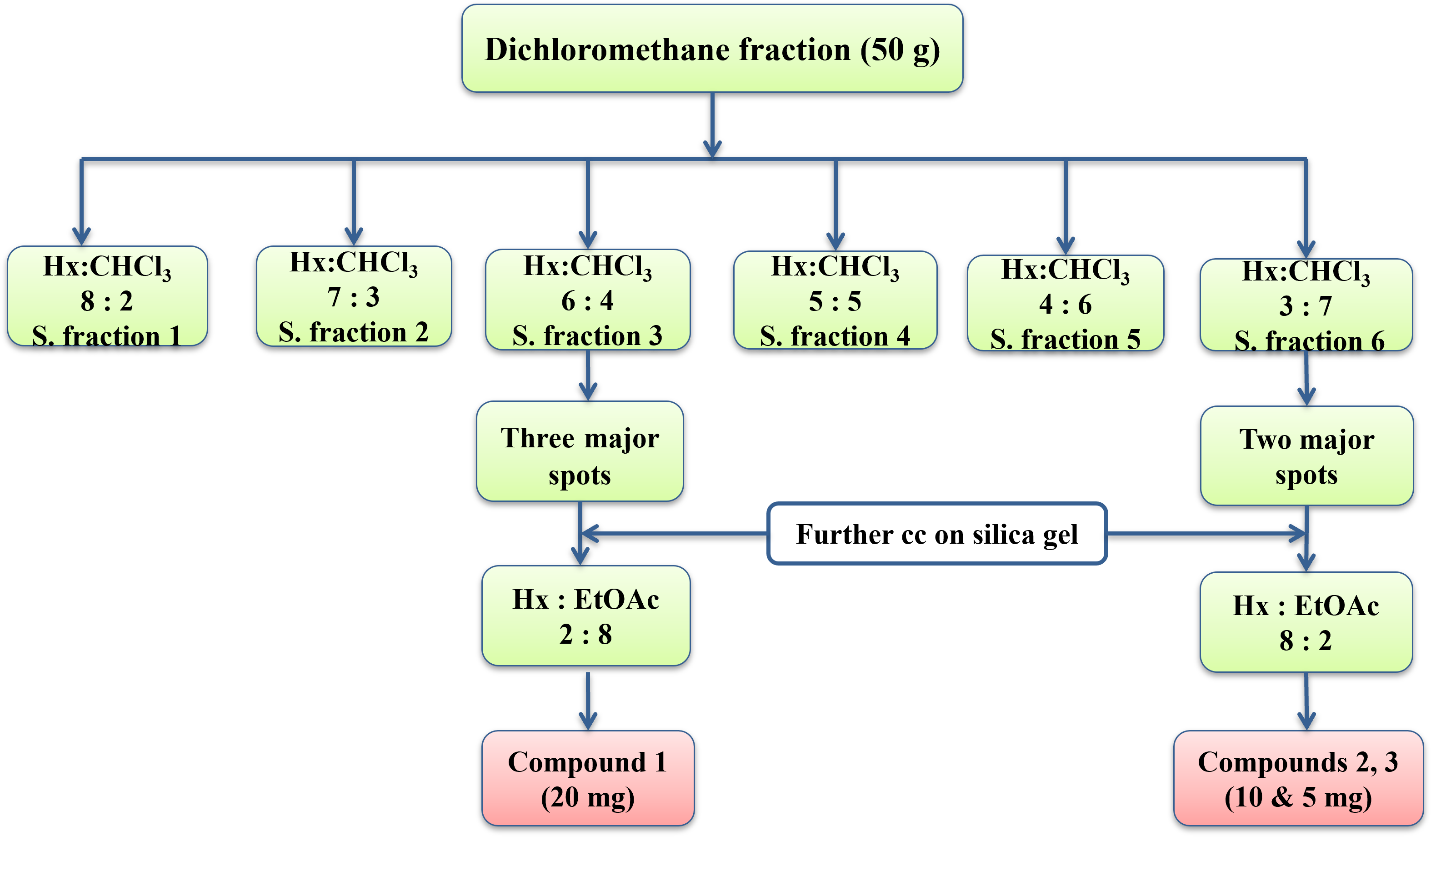


**B**


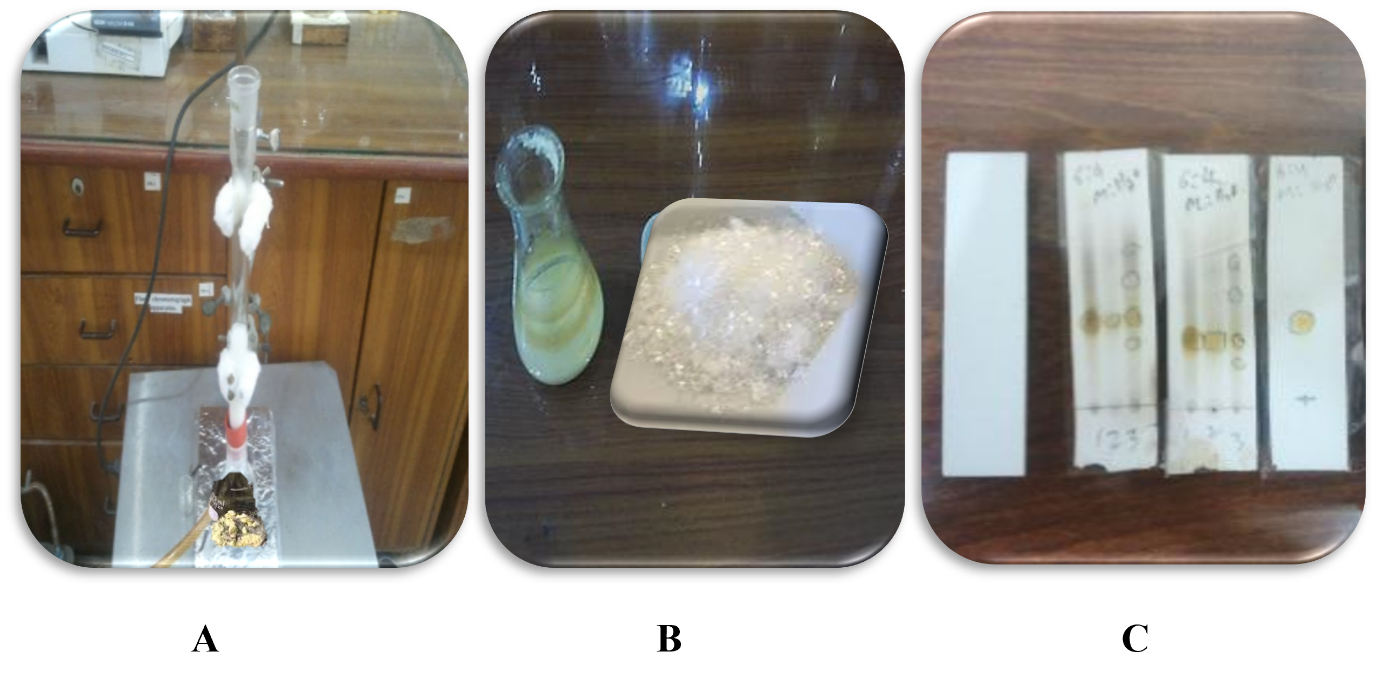


**S. Figure 2: Compounds Purification.** A) Shows schematic flow chart for DCM based fraction purification. B) Highlights the key steps of purification validations.
